# Supplementary material for: Biogenic sediments from coastal ecosystems to beach–dune systems: implications for the adaptation of mixed and carbonate beaches to future sea level rise
Source: Copernicus journal article supplement (doi:10.5194/bg-14-3191-2017), 2017-07-05
Supplement: Supplementary file 1 [file bg-14-3191-2017-supplement.zip]

S2 Table. List of the sediment samples collected from the main depositional environments. Percentages of the two principal components obtained by point-counting and classification of bioclasts.

| Samples                       | Bioclasts   | Non bioclastic | Molluscs  | Rhodophytes | Benthic Foraminifers | Echinoids | Brachiopods | Bryozoans |
|-------------------------------|-------------|----------------|-----------|-------------|----------------------|-----------|-------------|-----------|
| <b><i>Dunes</i></b>           |             |                |           |             |                      |           |             |           |
| SG-A1                         | 51          | 49             | 31        | 32          | 6                    | 3         | 22          | 6         |
| SG-A2                         | 54          | 46             | 22        | 42          | 4                    | 12        | 12          | 7         |
| SG-D3                         | 60          | 40             | 31        | 36          | 7                    | 13        | 8           | 4         |
| SG-D4                         | 50          | 51             | 20        | 43          | 9                    | 10        | 16          | 2         |
| SG-B1                         | 53          | 47             | 16        | 55          | 6                    | 11        | 10          | 2         |
| SG-B2                         | 45          | 55             | 17        | 56          | 8                    | 6         | 10          | 2         |
| SG-B3                         | 50          | 51             | 16        | 40          | 12                   | 12        | 12          | 7         |
| SG-C2                         | 58          | 42             | 14        | 54          | 3                    | 9         | 16          | 4         |
| SG-C3                         | 56          | 44             | 15        | 53          | 7                    | 9         | 13          | 3         |
| SG-A3                         | 54          | 46             | 23        | 41          | 6                    | 10        | 13          | 8         |
| SG-A4                         | 51          | 49             | 22        | 49          | 2                    | 3         | 17          | 7         |
| SG-C4                         | 54          | 46             | 17        | 51          | 11                   | 10        | 9           | 2         |
| SG-D2                         | 54          | 46             | 15        | 45          | 10                   | 12        | 14          | 5         |
| SG-B4                         | 54          | 46             | 9         | 36          | 12                   | 18        | 14          | 11        |
| SG-B5                         | 50          | 50             | 20        | 51          | 6                    | 5         | 14          | 3         |
| <i>Min.</i>                   | 45.2        | 39.8           | 9         | 32          | 2                    | 3         | 8           | 2         |
| <i>Max.</i>                   | 60.2        | 54.8           | 31        | 56          | 12                   | 18        | 22          | 11        |
| <b>Mean</b>                   | <b>53.0</b> | <b>47.1</b>    | <b>19</b> | <b>46</b>   | <b>7</b>             | <b>10</b> | <b>13</b>   | <b>5</b>  |
| <b><i>Subaerial beach</i></b> |             |                |           |             |                      |           |             |           |
| SG-45A                        | 54          | 46             | 27        | 42          | 6                    | 5         | 17          | 4         |
| SG-45B                        | 42          | 58             | 23        | 54          | 6                    | 4         | 12          | 0         |
| SG-A5                         | 35          | 65             | 22        | 43          | 13                   | 4         | 13          | 4         |
| SG-A6                         | 35          | 65             | 37        | 33          | 4                    | 7         | 15          | 4         |
| SG-B6                         | 50          | 50             | 19        | 60          | 0                    | 7         | 13          | 0         |
| SG-B7                         | 44          | 56             | 25        | 57          | 4                    | 1         | 12          | 1         |
| SG-C5                         | 29          | 71             | 20        | 51          | 6                    | 3         | 20          | 0         |
| SG-D5                         | 35          | 65             | 19        | 51          | 0                    | 12        | 18          | 0         |
| SG-D6                         | 44          | 56             | 19        | 55          | 1                    | 7         | 15          | 2         |
| SG-STB                        | 17          | 83             | 16        | 68          | 0                    | 0         | 16          | 0         |
| SG-STPD                       | 42          | 58             | 19        | 50          | 4                    | 13        | 11          | 3         |
| <i>Min.</i>                   | 16.7        | 45.9           | 16        | 33          | 0                    | 0         | 11          | 0         |
| <i>Max.</i>                   | 54.1        | 83.3           | 37        | 68          | 13                   | 13        | 20          | 4         |
| <b>Mean</b>                   | <b>38.9</b> | <b>61.1</b>    | <b>22</b> | <b>51</b>   | <b>4</b>             | <b>6</b>  | <b>15</b>   | <b>2</b>  |
| <b><i>Coastal wedge</i></b>   |             |                |           |             |                      |           |             |           |
| SG-12                         | 53          | 47.7           | 27        | 19          | 25                   | 6         | 3           | 20        |
| SG-13                         | 49          | 50.8           | 35        | 13          | 19                   | 6         | 6           | 21        |
| SG-14                         | 56          | 43.6           | 30        | 22          | 16                   | 8         | 11          | 14        |
| SG-15                         | 50          | 50.0           | 30        | 26          | 11                   | 6         | 10          | 17        |
| SG-16                         | 55          | 44.9           | 32        | 20          | 14                   | 10        | 10          | 15        |
| SG-19                         | 58          | 41.8           | 49        | 14          | 17                   | 0         | 6           | 14        |
| SG-20                         | 50          | 49.6           | 54        | 20          | 3                    | 0         | 7           | 16        |
| SG-21                         | 55          | 44.7           | 48        | 21          | 6                    | 1         | 9           | 15        |
| SG-22                         | 47          | 52.9           | 48        | 19          | 10                   | 9         | 4           | 9         |
| SG-27                         | 55          | 45.1           | 30        | 27          | 6                    | 10        | 3           | 23        |
| SG-28                         | 60          | 40.1           | 25        | 28          | 15                   | 8         | 11          | 14        |
| SG-29                         | 60          | 39.6           | 27        | 27          | 15                   | 7         | 11          | 14        |
| SG-33                         | 52          | 47.7           | 47        | 19          | 6                    | 10        | 0           | 19        |
| SG-34                         | 52          | 48.0           | 44        | 19          | 4                    | 11        | 0           | 23        |
| SG-35                         | 57          | 42.7           | 35        | 24          | 17                   | 10        | 0           | 13        |
| SG-36                         | 60          | 39.8           | 39        | 35          | 11                   | 5         | 2           | 9         |
| SG-37                         | 56          | 44.0           | 33        | 31          | 10                   | 8         | 2           | 16        |
| SG-38                         | 55          | 45.2           | 31        | 38          | 11                   | 5         | 2           | 13        |
| SG-40                         | 54          | 46.8           | 50        | 15          | 15                   | 4         | 4           | 12        |
| SG-41                         | 43          | 56.8           | 41        | 21          | 17                   | 8         | 5           | 8         |
| SG-42                         | 46          | 53.7           | 44        | 22          | 11                   | 7         | 7           | 11        |
| SG-43                         | 51          | 48.7           | 46        | 22          | 5                    | 6         | 8           | 13        |
| SG-44                         | 54          | 45.5           | 37        | 26          | 10                   | 5         | 6           | 15        |
| SG-45                         | 60          | 39.8           | 31        | 28          | 14                   | 5         | 5           | 17        |
| SG-46                         | 58          | 42.2           | 22        | 28          | 15                   | 5         | 13          | 17        |
| SG-47                         | 50          | 50.1           | 23        | 22          | 14                   | 10        | 12          | 18        |
| <i>Min.</i>                   | 43.2        | 39.6           | 22        | 13          | 3                    | 0         | 0           | 8         |
| <i>Max.</i>                   | 60.4        | 56.8           | 54        | 38          | 25                   | 11        | 13          | 23        |
| <b>Mean</b>                   | <b>53.8</b> | <b>46.2</b>    | <b>37</b> | <b>23</b>   | <b>12</b>            | <b>6</b>  | <b>6</b>    | <b>15</b> |
| <b><i>Offshore</i></b>        |             |                |           |             |                      |           |             |           |
| SG-26                         | 48          | 52.3           | 25        | 43          | 0                    | 3         | 4           | 24        |
| SG-32                         | 48          | 52.4           | 26        | 32          | 3                    | 11        | 7           | 20        |
| SG-18                         | 47          | 52.6           | 18        | 48          | 3                    | 4         | 5           | 21        |
| P11                           | 70          | 30.1           | 33        | 15          | 11                   | 18        | 7           | 16        |
| P3                            | 45          | 54.9           | 28        | 35          | 1                    | 14        | 6           | 17        |
| P5                            | 62          | 39.2           | 30        | 22          | 5                    | 16        | 5           | 23        |
| P6                            | 61          | 38.2           | 33        | 16          | 9                    | 16        | 7           | 18        |
| P8                            | 65          | 35.2           | 36        | 13          | 4                    | 18        | 8           | 20        |
| <i>Min.</i>                   | 45.1        | 30.1           | 18        | 13          | 0                    | 3         | 4           | 16        |
| <i>Max.</i>                   | 69.9        | 54.9           | 36        | 48          | 11                   | 18        | 8           | 24        |
| <b>Mean</b>                   | <b>55.7</b> | <b>44.3</b>    | <b>29</b> | <b>28</b>   | <b>5</b>             | <b>13</b> | <b>6</b>    | <b>20</b> |
