# Supplementary material for: Biogenic sediments from coastal ecosystems to beach–dune systems: implications for the adaptation of mixed and carbonate beaches to future sea level rise
Source: Copernicus journal article supplement (doi:10.5194/bg-14-3191-2017), 2017-07-05
Supplement: Supplementary file 2 [file bg-14-3191-2017-supplement.zip]

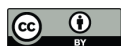

## *Supplement of*

# **Biogenic sediments from coastal ecosystems to beach–dune systems: implications for the adaptation of mixed and carbonate beaches to future sea level rise**

**Giovanni De Falco et al.**

*Correspondence to:* Giovanni De Falco ([giovanni.defalco@cnr.it](mailto:giovanni.defalco@cnr.it))

- [bg-14-3191-2017-supplement-title-page.pdf](#)
- [S1 Table\\_rev.pdf](#)
- [S2 Table\\_rev.pdf](#)

The copyright of individual parts of the supplement might differ from the CC BY 3.0 License.
