# Supplementary material for: Biogenic sediments from coastal ecosystems to beach–dune systems: implications for the adaptation of mixed and carbonate beaches to future sea level rise
Source: Copernicus journal article supplement (doi:10.5194/bg-14-3191-2017), 2017-07-05
Supplement: Supplementary file 3 [file bg-14-3191-2017-supplement.zip]

S1 Table. Grain size (in percent) and CaCO<sub>3</sub> content of sediment samples collected from the main depositional environments.

| Samples               | Coordinates |         | >2000<br>μm | 2000<br>μm | 1400<br>μm | 1000<br>μm | 710<br>μm | 500<br>μm | 354<br>μm | 250<br>μm | 180<br>μm | 125<br>μm | 90<br>μm | <90<br>μm | CaCO <sub>3</sub><br>% |
|-----------------------|-------------|---------|-------------|------------|------------|------------|-----------|-----------|-----------|-----------|-----------|-----------|----------|-----------|------------------------|
| <b>Dunes</b>          |             |         |             |            |            |            |           |           |           |           |           |           |          |           |                        |
| SG-A1                 | 452188      | 4414459 | 0.0         | 0.0        | 0.1        | 0.1        | 0.5       | 5.9       | 18.8      | 36.6      | 29.1      | 8.1       | 0.5      | 0.3       | 84                     |
| SG-A2                 | 452133      | 4414530 | 0.0         | 0.0        | 0.1        | 0.9        | 8.6       | 29.1      | 27.2      | 23.0      | 9.5       | 1.5       | 0.1      | 0.0       | 78                     |
| SG-D3                 | 451262      | 4415704 | 0.0         | 0.0        | 0.0        | 0.1        | 0.7       | 8.5       | 26.0      | 40.3      | 20.4      | 3.7       | 0.1      | 0.0       | 86                     |
| SG-D4                 | 451200      | 4415707 | 0.0         | 0.0        | 0.1        | 0.6        | 4.2       | 15.4      | 25.3      | 32.2      | 18.0      | 3.8       | 0.2      | 0.1       | 73                     |
| SG-B1                 | 452214      | 4414545 | 0.0         | 0.0        | 0.0        | 0.0        | 1.5       | 15.2      | 30.2      | 34.2      | 15.7      | 2.9       | 0.1      | 0.1       | 73                     |
| SG-B2                 | 452153      | 4414576 | 0.0         | 0.0        | 0.1        | 1.4        | 9.4       | 24.6      | 25.4      | 24.7      | 11.9      | 2.3       | 0.2      | 0.0       | 46                     |
| SG-B3                 | 452013      | 4414629 | 0.0         | 0.0        | 0.0        | 0.3        | 4.3       | 18.9      | 27.1      | 31.6      | 15.3      | 2.4       | 0.0      | 0.0       | 69                     |
| SG-C2                 | 451364      | 4415663 | 0.0         | 0.0        | 0.0        | 0.0        | 0.2       | 3.3       | 17.8      | 41.0      | 31.3      | 6.2       | 0.1      | 0.0       | 78                     |
| SG-C3                 | 451283      | 4415654 | 0.1         | 0.0        | 0.0        | 0.0        | 1.1       | 10.6      | 25.1      | 38.6      | 20.8      | 3.6       | 0.1      | 0.0       | 100                    |
| SG-A3                 | 451936      | 4414547 | 0.0         | 0.0        | 0.1        | 1.6        | 7.8       | 22.9      | 27.3      | 28.8      | 10.6      | 0.9       | 0.0      | 0.0       | 67                     |
| SG-A4                 | 451891      | 4414562 | 0.0         | 0.0        | 0.0        | 1.2        | 12.0      | 30.2      | 27.9      | 21.6      | 6.3       | 0.7       | 0.0      | 0.0       | 70                     |
| SG-C4                 | 451255      | 4415655 | 0.0         | 0.0        | 0.0        | 0.0        | 0.2       | 4.5       | 23.0      | 44.6      | 24.3      | 3.3       | 0.0      | 0.0       | 78                     |
| SG-D2                 | 451345      | 4415713 | 0.0         | 0.0        | 0.0        | 0.0        | 0.1       | 2.7       | 18.1      | 40.0      | 31.5      | 7.3       | 0.1      | 0.0       | 76                     |
| SG-B4                 | 451952      | 4414432 | 0.0         | 0.0        | 0.3        | 2.6        | 8.8       | 19.1      | 25.1      | 29.3      | 12.9      | 1.8       | 0.1      | 0.0       | 69                     |
| SG-B5                 | 451890      | 4414636 | 0.0         | 0.0        | 0.3        | 2.9        | 13.0      | 27.4      | 21.5      | 30.6      | 4.0       | 0.4       | 0.0      | 0.0       | 82                     |
| Min.                  |             |         | 0.0         | 0.0        | 0.0        | 0.0        | 0.1       | 2.7       | 17.8      | 21.6      | 4.0       | 0.4       | 0.0      | 0.0       | 45.8                   |
| Max.                  |             |         | 0.1         | 0.0        | 0.3        | 2.9        | 13.0      | 30.2      | 30.2      | 44.6      | 31.5      | 8.1       | 0.5      | 0.3       | 100.0                  |
| Mean                  |             |         | 0.0         | 0.0        | 0.1        | 0.8        | 4.8       | 15.9      | 24.4      | 33.2      | 17.4      | 3.3       | 0.1      | 0.0       | 75 ± 12                |
| <b>Suberial beach</b> |             |         |             |            |            |            |           |           |           |           |           |           |          |           |                        |
| SG-45A                | 451403      | 4415383 | 2.5         | 5.1        | 12.0       | 17.1       | 16.4      | 18.1      | 16.0      | 9.9       | 2.6       | 0.2       | 0.0      | 0.0       | 46                     |
| SG-45B                | 451446      | 4415404 | 0.0         | 0.0        | 0.2        | 1.2        | 4.4       | 15.0      | 27.4      | 34.5      | 14.6      | 2.5       | 0.1      | 0.0       | 74                     |
| SG-A5                 | 451870      | 4414567 | 0.3         | 0.5        | 4.3        | 15.5       | 30.5      | 27.2      | 14.1      | 6.3       | 1.2       | 0.1       | 0.0      | 0.0       | 30                     |
| SG-A6                 | 451854      | 4414571 | 0.1         | 1.2        | 11.0       | 25.8       | 24.0      | 15.8      | 12.3      | 7.8       | 1.8       | 0.1       | 0.0      | 0.0       | 41                     |
| SG-B6                 | 451862      | 4414640 | 0.0         | 0.6        | 3.1        | 9.6        | 19.0      | 24.8      | 19.7      | 15.7      | 5.3       | 0.6       | 0.0      | 0.0       | 61                     |
| SG-B7                 | 451843      | 4414646 | 0.3         | 1.4        | 8.7        | 17.3       | 19.5      | 16.2      | 19.5      | 10.1      | 5.3       | 1.7       | 0.0      | 0.0       | 48                     |
| SG-C5                 | 451208      | 4415660 | 6.8         | 8.9        | 16.9       | 21.1       | 19.2      | 12.6      | 7.1       | 4.9       | 2.0       | 0.5       | 0.0      | 0.0       | 27                     |
| SG-D5                 | 451170      | 4415710 | 0.2         | 0.6        | 3.5        | 14.1       | 34.7      | 32.2      | 10.7      | 3.4       | 0.6       | 0.1       | 0.0      | 0.0       | 23                     |
| SG-D6                 | 451148      | 4415712 | 0.4         | 2.3        | 13.3       | 22.6       | 20.8      | 18.1      | 11.8      | 7.7       | 2.7       | 0.4       | 0.0      | 0.0       | 39                     |
| SG-STB                | 451985      | 4414074 | 0.4         | 1.7        | 8.4        | 27.3       | 37.9      | 18.1      | 4.3       | 1.5       | 0.3       | 0.0       | 0.0      | 0.0       | 22                     |
| SG-STPD               | 452006      | 4414071 | 0.0         | 0.1        | 0.1        | 0.6        | 4.3       | 23.2      | 33.4      | 28.3      | 8.9       | 1.0       | 0.0      | 0.0       | 71                     |
| Min.                  |             |         | 0.0         | 0.0        | 0.1        | 0.6        | 4.3       | 12.6      | 4.3       | 1.5       | 0.3       | 0.0       | 0.0      | 0.0       | 22.2                   |
| Max.                  |             |         | 6.8         | 8.9        | 16.9       | 27.3       | 37.9      | 32.2      | 33.4      | 34.5      | 14.6      | 2.5       | 0.1      | 0.0       | 74.3                   |
| Mean                  |             |         | 1.0         | 2.0        | 7.4        | 15.7       | 21.0      | 20.1      | 16.0      | 11.9      | 4.1       | 0.7       | 0.0      | 0.0       | 44 ± 18                |
| <b>Coastal wedge</b>  |             |         |             |            |            |            |           |           |           |           |           |           |          |           |                        |
| SG-12                 | 450861      | 4413441 | 0.1         | 0.1        | 0.3        | 0.8        | 1.8       | 2.7       | 3.2       | 9.6       | 20.8      | 35.1      | 15.9     | 9.5       | 66                     |
| SG-13                 | 451086      | 4413372 | 0.5         | 0.1        | 0.2        | 0.4        | 0.8       | 1.0       | 1.5       | 8.9       | 23.1      | 44.8      | 12.1     | 6.5       | 45                     |
| SG-14                 | 451311      | 4413311 | 0.4         | 0.0        | 0.1        | 0.1        | 0.1       | 0.4       | 1.5       | 8.7       | 23.1      | 51.4      | 12.1     | 2.1       | 52                     |
| SG-15                 | 451557      | 4413253 | 0.1         | 0.1        | 0.2        | 0.4        | 0.7       | 2.0       | 5.1       | 15.9      | 26.1      | 42.5      | 6.3      | 0.8       | 70                     |
| SG-16                 | 451753      | 4413209 | 0.0         | 0.0        | 0.0        | 0.1        | 0.9       | 5.2       | 14.5      | 32.0      | 30.3      | 16.1      | 0.8      | 0.0       | 75                     |
| SG-19                 | 451133      | 4413749 | 0.0         | 0.1        | 0.2        | 0.5        | 1.3       | 2.8       | 3.8       | 6.4       | 10.3      | 31.3      | 24.8     | 18.5      | 83                     |
| SG-20                 | 451379      | 4413698 | 0.0         | 0.0        | 0.0        | 0.1        | 0.1       | 0.7       | 1.4       | 9.0       | 25.8      | 56.8      | 1.8      | 4.3       | 67                     |
| SG-21                 | 451648      | 4413640 | 0.1         | 0.0        | 0.0        | 0.1        | 0.6       | 2.6       | 7.6       | 23.3      | 32.1      | 29.2      | 4.0      | 0.4       | 77                     |
| SG-22                 | 451823      | 4413990 | 0.0         | 0.0        | 0.0        | 0.0        | 0.4       | 2.7       | 9.3       | 25.0      | 34.4      | 26.6      | 1.5      | 0.1       | 72                     |
| SG-27                 | 451457      | 4414076 | 0.0         | 0.0        | 0.1        | 0.3        | 0.9       | 1.8       | 1.4       | 6.0       | 19.1      | 46.8      | 18.6     | 4.9       | 34                     |
| SG-28                 | 451698      | 4414040 | 0.0         | 0.0        | 0.0        | 0.1        | 0.6       | 3.6       | 10.8      | 29.0      | 32.6      | 21.4      | 1.8      | 0.1       | 71                     |
| SG-29                 | 451823      | 4413990 | 0.0         | 0.0        | 0.0        | 0.2        | 1.2       | 7.1       | 17.7      | 35.2      | 28.1      | 10.1      | 0.3      | 0.0       | 79                     |
| SG-33                 | 451103      | 4414462 | 0.0         | 0.0        | 0.2        | 0.4        | 0.9       | 1.9       | 2.3       | 6.9       | 17.0      | 38.8      | 20.5     | 10.9      | 71                     |
| SG-34                 | 451326      | 4414397 | 0.0         | 0.0        | 0.0        | 0.1        | 0.1       | 0.8       | 1.3       | 7.4       | 20.2      | 39.2      | 21.2     | 9.6       | 61                     |
| SG-35                 | 451508      | 4414315 | 0.0         | 0.0        | 0.0        | 0.2        | 0.5       | 1.8       | 3.9       | 13.0      | 24.4      | 39.1      | 13.8     | 3.3       | 62                     |
| SG-36                 | 451731      | 4414245 | 0.0         | 0.0        | 0.0        | 0.1        | 0.7       | 4.3       | 9.9       | 22.6      | 36.8      | 24.4      | 1.2      | 0.0       | 73                     |
| SG-37                 | 451875      | 4414207 | 0.0         | 0.0        | 0.0        | 0.1        | 2.1       | 1.0       | 6.2       | 31.8      | 39.9      | 18.3      | 0.5      | 0.0       | 69                     |
| SG-38                 | 451965      | 4414175 | 0.1         | 0.9        | 3.5        | 6.8        | 10.0      | 18.9      | 23.0      | 24.3      | 10.1      | 2.3       | 0.0      | 0.0       | 67                     |
| SG-40                 | 450891      | 4414814 | 0.0         | 0.0        | 0.0        | 0.1        | 1.4       | 4.4       | 5.5       | 11.8      | 20.6      | 37.4      | 12.7     | 6.1       | 68                     |
| SG-41                 | 451132      | 4414733 | 0.0         | 0.0        | 0.1        | 0.2        | 0.4       | 1.7       | 2.7       | 5.1       | 14.2      | 41.7      | 26.8     | 7.1       | 63                     |
| SG-42                 | 451360      | 4414655 | 0.0         | 0.1        | 0.1        | 0.1        | 0.2       | 0.8       | 1.1       | 4.7       | 16.6      | 43.4      | 25.6     | 7.4       | 50                     |
| SG-43                 | 451564      | 4414590 | 0.0         | 0.0        | 0.0        | 0.1        | 0.4       | 1.9       | 5.8       | 19.5      | 30.2      | 34.8      | 6.6      | 0.6       | 80                     |
| SG-44                 | 451722      | 4414812 | 0.0         | 0.0        | 0.0        | 0.1        | 0.6       | 3.6       | 11.8      | 31.9      | 35.5      | 16.0      | 0.5      | 0.0       | 79                     |
| SG-45                 | 451402      | 4415383 | 0.0         | 0.0        | 0.1        | 0.3        | 1.3       | 5.7       | 13.6      | 28.2      | 31.7      | 18.2      | 0.8      | 0.0       | 69                     |
| SG-46                 | 451346      | 4415350 | 0.1         | 0.1        | 0.2        | 0.5        | 1.9       | 7.3       | 16.4      | 29.7      | 28.5      | 14.3      | 1.0      | 0.0       | 74                     |
| SG-47                 | 451230      | 4415263 | 0.0         | 0.0        | 0.0        | 0.1        | 0.7       | 3.6       | 9.1       | 23.3      | 31.2      | 27.1      | 4.3      | 0.6       | 70                     |
| Min.                  |             |         | 0.0         | 0.0        | 0.0        | 0.0        | 0.1       | 0.4       | 1.1       | 4.7       | 10.1      | 2.3       | 0.0      | 0.0       | 33.9                   |
| Max.                  |             |         | 0.5         | 0.9        | 3.5        | 6.8        | 10.0      | 18.9      | 23.0      | 35.2      | 39.9      | 56.8      | 26.8     | 18.5      | 83.0                   |
| Mean                  |             |         | 0.1         | 0.1        | 0.2        | 0.5        | 1.2       | 3.5       | 7.3       | 18.0      | 25.5      | 31.0      | 9.1      | 3.6       | 67 ± 11                |
| <b>Offshore</b>       |             |         |             |            |            |            |           |           |           |           |           |           |          |           |                        |
| SG-26                 | 451268      | 4414125 | 0.3         | 2.4        | 11.8       | 39.3       | 40.2      | 2.9       | 1.2       | 0.9       | 0.7       | 0.1       | 0.1      | 0.0       | 93                     |
| SG-32                 | 450850      | 4414554 | 0.3         | 0.5        | 2.5        | 7.4        | 34.9      | 45.2      | 5.2       | 1.1       | 1.0       | 1.3       | 0.3      | 0.2       | 66                     |
| SG-18                 | 450850      | 4413814 | 0.2         | 0.8        | 3.2        | 14.2       | 50.2      | 28.7      | 1.2       | 0.5       | 0.3       | 0.3       | 0.2      | 0.1       | 67                     |
| P11                   | 451038      | 4415179 | 0.2         | 0.3        | 0.3        | 0.6        | 2.5       | 13.2      | 24.3      | 20.5      | 24.1      | 12.9      | 0.9      | 0.4       | 71                     |
| P3                    | 450964      | 4414146 | 11.5        | 4.1        | 7.7        | 13.3       | 27.3      | 24.8      | 4.6       | 2.1       | 1.5       | 1.9       | 0.7      | 0.6       | 54                     |
| P5                    | 450724      | 4414718 | 6.0         | 1.1        | 3.8        | 8.3        | 23.8      | 39.9      | 7.6       | 2.5       | 2.1       | 2.4       | 0.7      | 1.7       | 61                     |
| P6                    | 450701      | 4414884 | 0.1         | 0.4        | 1.3        | 3.9        | 23.7      | 45.5      | 9.9       | 4.3       | 3.6       | 4.7       | 1.1      | 1.5       | 55                     |
| P8                    | 450208      | 4415336 | 6.0         | 3.4        | 7.0        | 11.5       | 23.6      | 29.7      | 12.3      | 2.7       | 1.3       | 1.2       | 0.7      | 0.7       | 76                     |
| Min.                  |             |         | 0.1         | 0.3        | 0.3        | 0.6        | 2.5       | 2.9       | 1.2       | 0.5       | 0.3       | 0.1       | 0.1      | 0.0       | 54.5                   |
| Max.                  |             |         | 11.5        | 4.1        | 11.8       | 39.3       | 50.2      | 45.5      | 24.3      | 20.5      | 24.1      | 12.9      | 1.1      | 1.7       | 93.0                   |
| Mean                  |             |         | 0.7         | 0.4        | 1.3        | 3.2        | 7.2       | 9.3       | 7.8       | 15.2      | 20.9      | 24.9      | 7.5      | 3.3       | 68 ± 13                |
